# Supplementary material for: Anti-Metatype Antibody Screening, Sandwich Immunoassay Development, and Structural Insights for β-Lactams Based on Penicillin Binding Protein
Source: MDPI journal article supplement (doi:10.3390/molecules26185569), 2021-09-13
Supplement: s1 [file s1]

Supporting Information

**Anti- metatype antibody screening, sandwich  
immunoassay development, and structural insights for  
 $\beta$ -lactams based on penicillin binding protein**

Yuchen Bai, Leina Dou, Weilin Wu, Zhimin Lu, Jiaqian Kou, Jianzhong Shen, Kai  
Wen\*, Zhanhui Wang

*College of Veterinary Medicine, China Agricultural University, Beijing Key  
Laboratory of Detection Technology for Animal Derived Food Safety, Beijing  
Laboratory for Food Quality and Safety, 100193 Beijing, People's Republic of China*

*\* Author to whom correspondence should be addressed*

*Tel: +86-10-6273 4565*

*Fax: +86-10-6273 1032*

*E-mail: wenkai@cau.edu.cn*

## **Buffers**

The common buffer solutions used in the experiment are listed:

- (1) Coating buffer ( $0.05 \text{ mol L}^{-1}$  carbonate buffer, pH 9.6)
- (2) Phosphate buffer solution (PBS buffer,  $0.01 \text{ mol L}^{-1}$ , pH 7.4)
- (2) Blocking buffer (2% skim milk powder (w/v))
- (3) Washing buffer (PBST, PBS buffer with 0.05% Tween-20 (v/v), pH 7.2)
- (4) Boric acid buffer ( $0.02 \text{ mol L}^{-1}$ , pH 9.0, containing 10% DMF)
- (5) Stopping reagent ( $2 \text{ mol L}^{-1} \text{ H}_2\text{SO}_4$ )

Table S1 Identification of PBP2x\*-drugs.

| complex    | OD values |
|------------|-----------|
| PBP2x*-PNG | 0.02      |
| PBP2x*-AMP | 0.06      |
| PBP2x*-AMX | 0.03      |
| PBP2x*-CTX | 0.02      |
| PBP2x*-KF  | 0.05      |

Table S2. Molecular descriptors of  $\beta$ -lactams.

| $\beta$ -lactams | MW  | SA     | V <sub>m</sub> | E        | $\mu$ | MPI   | PSA    | Log P |
|------------------|-----|--------|----------------|----------|-------|-------|--------|-------|
| PNG              | 334 | 349.91 | 383.72         | -1421.77 | 6.56  | 15.28 | 227.32 | 0.84  |
| AZL              | 461 | 456.26 | 506.79         | -1889.07 | 4.38  | 17.17 | 307.44 | -0.74 |
| AMX              | 365 | 365.85 | 406.47         | -1551.59 | 4.91  | 15.82 | 235.05 | -0.58 |
| AMP              | 349 | 359.57 | 397.55         | -1476.76 | 5.57  | 14.89 | 231.54 | -0.2  |
| OXA              | 402 | 391.47 | 448.25         | -1665.10 | 6.46  | 15.28 | 256.52 | 1.5   |
| CLX              | 437 | 413.48 | 469.29         | -2123.97 | 7.50  | 15.78 | 282.88 | 2.06  |
| PIPC             | 518 | 513.33 | 574.90         | -2079.76 | 6.77  | 17.27 | 353.25 | -0.71 |
| DCX              | 470 | 433.68 | 490.75         | -2582.84 | 6.82  | 15.18 | 276.65 | 2.62  |
| CFM              | 456 | 428.85 | 467.15         | -2205.11 | 4.54  | 17.45 | 287.51 | 0.25  |
| CFN              | 460 | 444.25 | 493.17         | -2154.24 | 18.32 | 26.67 | 342.16 | -8.29 |
| CPZ              | 650 | 608.81 | 684.48         | -2845.33 | 6.16  | 18.40 | 431.69 | -0.56 |
| CFAP             | 423 | 412.84 | 455.00         | -2060.56 | 5.74  | 16.91 | 277.45 | -3.68 |
| CFP              | 484 | 462.94 | 524.20         | -2228.60 | 15.75 | 25.66 | 346.09 | -5.97 |
| CTRX             | 558 | 506.00 | 562.11         | -2843.24 | 6.15  | 19.10 | 349.09 | 0.02  |
| KF               | 427 | 384.85 | 420.15         | -1967.68 | 12.89 | 19.55 | 272.55 | 0.04  |
| CFT              | 527 | 489.19 | 539.45         | -2717.27 | 4.05  | 15.86 | 308.51 | 1.17  |
| CTX              | 458 | 442.07 | 474.00         | -2206.28 | 4.37  | 16.41 | 291.37 | 0.14  |
| CFZ              | 463 | 423.66 | 46.73          | -2465.01 | 8.86  | 19.57 | 308.16 | -1.09 |

molecular weight, MW; van der Waals surface area, SA; molecular volume, V<sub>m</sub>; energy, E; molecular dipole

moment,  $\mu$ ; molecular polarity index, MPI; polar surface area, PSA; hydrophobic constant, Log P.

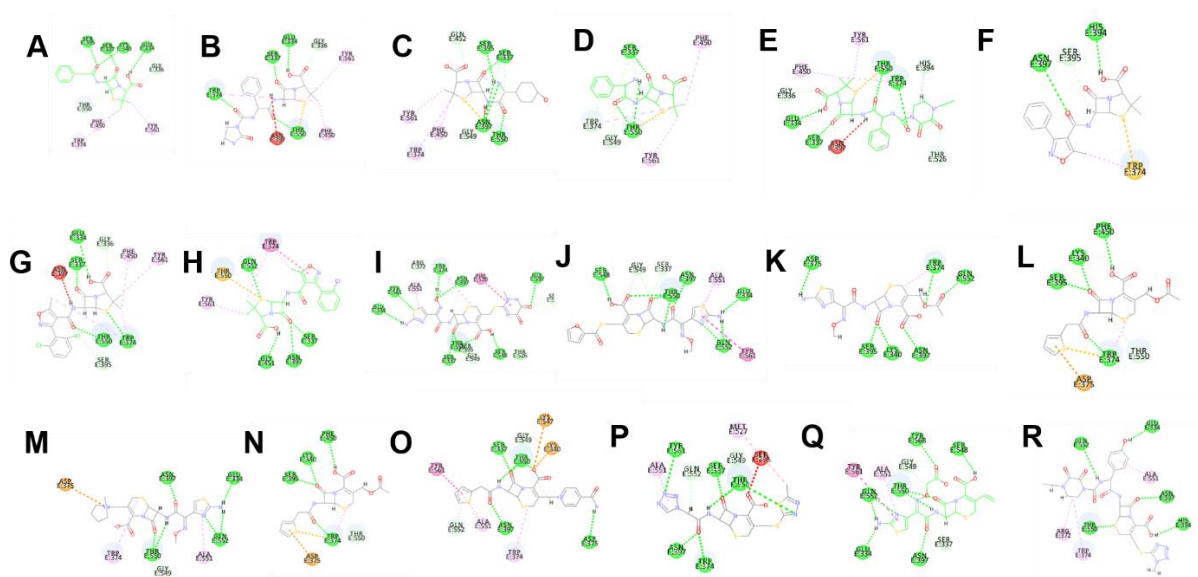

Figure S1. Two-dimensional schematic diagram of the interactions between PBP2x (PDB code: 2z2m) and (A) PNG; (B) AZL; (C) AMX; (D) AMP; (E) PIPC; (F) OXA; (G) DCX; (H) CLX; (I) CTRX; (J) CFT; (K) CTX; (L) CFAP; (M) CFP; (N) KF; (O) CFN; (P) CFZ; (Q) CFM; (R) CPZ. Hydrogen bonds are shown as green dashed lines, hydrophobic interactions are displayed as purple dashes, and the electrostatic force is expressed as orange dashes.
